# Supplementary material
Source: PubMed Central journal article supplement (PMC4492376)
Supplement: supp_115.175711_FigureS4.pdf [file supp_115.175711_FigureS4.pdf]

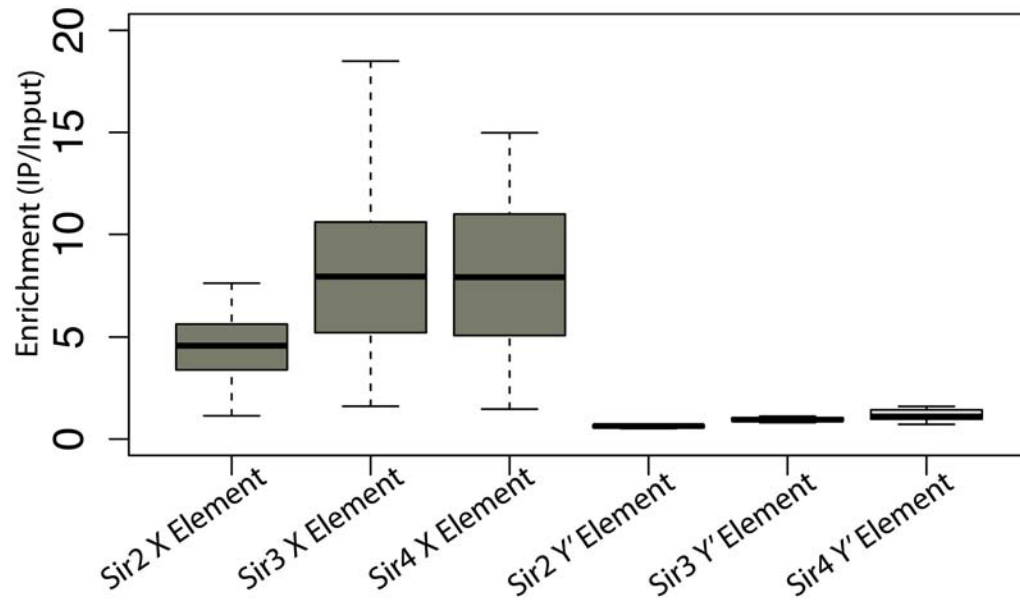

**Figure S4.** Sir proteins are not enriched at Y' elements. Average enrichment for all annotated X elements and Y' elements was calculated for all three Sir proteins. Enrichment was determined by the average IP/Input for that sample for the X elements and Y' elements for each chromosome as defined in SGD.
